# Supplementary material for: FAU-Type Zeolite Synthesis from Clays and Its Use for the Simultaneous Adsorption of Five Divalent Metals from Aqueous Solutions
Source: MDPI journal article supplement (doi:10.3390/ma14133738), 2021-07-03
Supplement: s1 [file s1]

## Article

# FAU-Type Zeolite Synthesis from Clays and Its Use for the Simultaneous Adsorption of Five Divalent Metals from Aqueous Solutions

Ifeoma V. Joseph \*, Lubomira Tosheva \*, Gary Miller and Aidan M. Doyle

Department of Natural Sciences, Manchester Metropolitan University, Chester Street, Manchester M1 5GD, UK; g.miller@mmu.ac.uk (G.M.); a.m.doyle@mmu.ac.uk (A.M.D.)

\* Correspondence: i.joseph@mmu.ac.uk (I.V.J.); l.tosheva@mmu.ac.uk (L.T.)

**Citation:** Joseph, I.V.; Tosheva, L.; Miller, G.; Doyle, A.M. FAU-Type Zeolite Synthesis from Clays and Its Use for the Simultaneous Adsorption of Five Divalent Metals from Aqueous Solutions. *Materials* **2021**, *14*, 3738. <https://doi.org/10.3390/ma14133738>

Academic Editors: Miguel A. Camblor and Serena Esposito

Received: 29 April 2021

Accepted: 30 June 2021

Published: 3 July 2021

**Publisher's Note:** MDPI stays neutral with regard to jurisdictional claims in published maps and institutional affiliations.

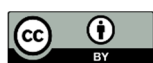

**Copyright:** © 2021 by the authors. Submitted for possible open access publication under the terms and conditions of the Creative Commons Attribution (CC BY) license (<http://creativecommons.org/licenses/by/4.0/>).

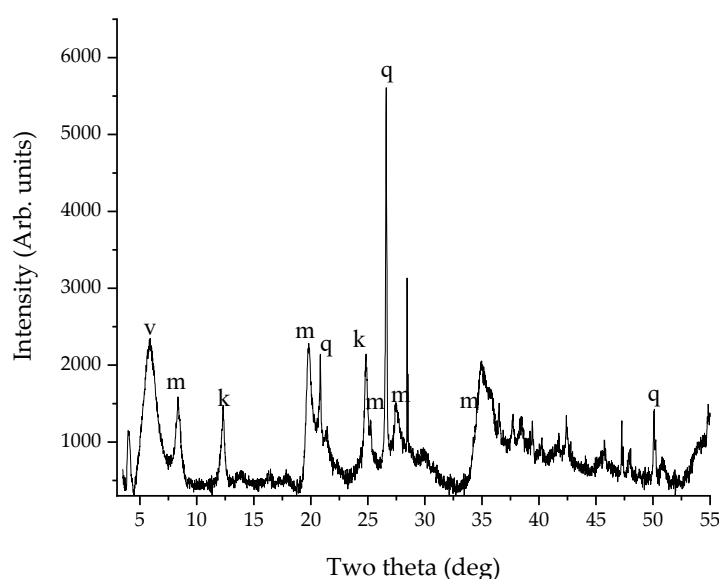

**Figure S1.** XRD patterns of oriented raw vermiculite - kaolinite clay (VK). k kaolinite, m muscovite, v vermiculite, q quartz.

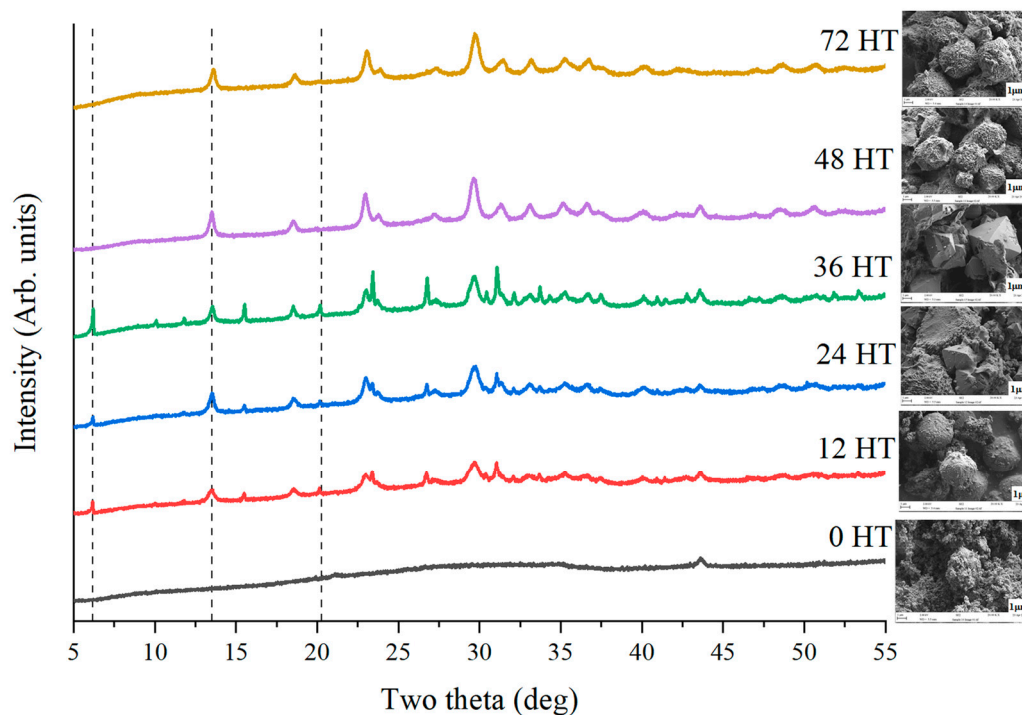

**Figure S2.** XRD patterns of FAU zeolites from VK for hydrothermal treatment (HT) times from 0 h to 72 h. Dashed lines represent the main FAU zeolite peaks. Inserts contain SEM images of the corresponding samples.

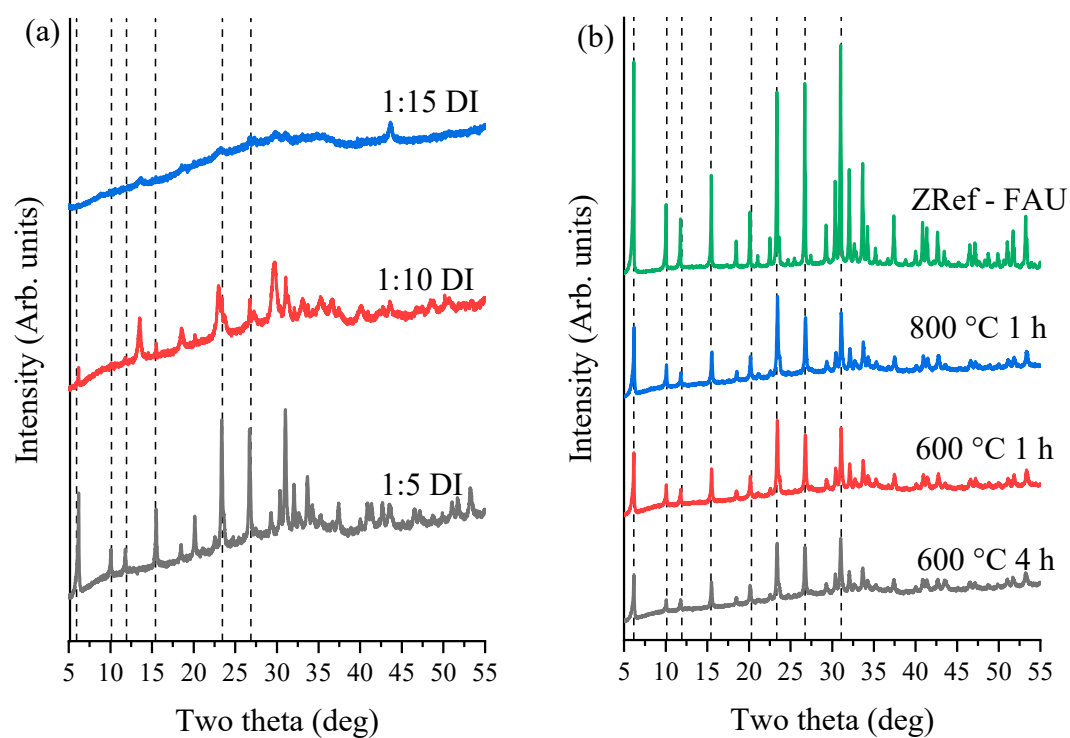

**Figure S3.** XRD patterns FAU zeolites prepared using (a) fused sample to deionised (DI) water mass ratios of 1:5 to 1:15 and (b) different temperatures and times during the alkaline fusion step. Dashed lines represent main FAU zeolite peaks.

**Table S1.** XRF chemical compositions (wt%) of reference zeolite (ZRef-FAU) and the optimal zeolite from clay (ZVK-FAU).

| Adsorbent | SiO <sub>2</sub> | Al <sub>2</sub> O <sub>3</sub> | Na <sub>2</sub> O | MgO  | Fe <sub>2</sub> O <sub>3</sub> | TiO <sub>2</sub> | CaO  |
|-----------|------------------|--------------------------------|-------------------|------|--------------------------------|------------------|------|
| ZRef-FAU  | 32.20            | 23.50                          | 18.90             |      | 0.03                           | 0.00             | 0.01 |
| ZVK-FAU   | 42.80            | 22.50                          | 19.00             | 2.69 | 9.31                           | 1.44             | 1.13 |

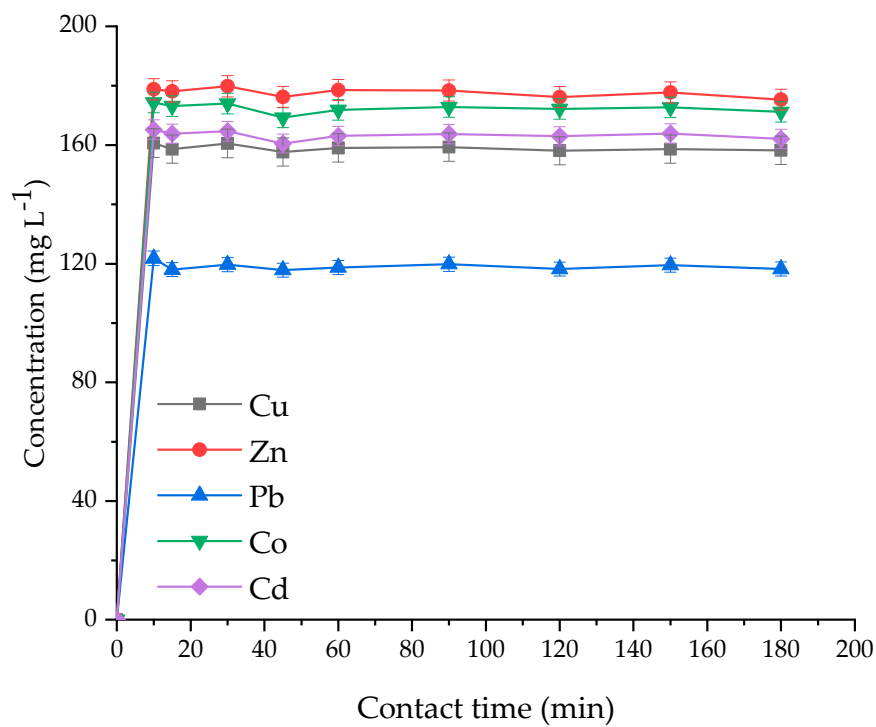**Figure S4.** Raw VK adsorption studies using 5 g L<sup>-1</sup> clay loading for C<sub>0</sub> = 200 mg L<sup>-1</sup> and duration of 10 to 180 min.
